# Supplementary material for: 2-Pyridylmethylphosphonic acid: a flexible, multi-dentate ligand for metal phosphonates
Source: Royal Society of Chemistry journal article supplement (doi:10.1039/c0ce00969e), 2011-01-01
Supplement: c0ce00969e.pdf [file c0ce00969e.pdf]

## Experimental Supporting Information

**Electrochemical Studies:** 0.3 M [TBA]PF<sub>6</sub> and KCl solutions were prepared in DMF and water respectively. 10 mM solutions of **1** and **3** were prepared by dissolving each in DMF, then adding [TBA]PF<sub>6</sub> /DMF solution in a 2:1 complex to electrolyte solution ratio. Aqueous samples were prepared similarly using KCl solution. A three-electrode configuration was employed in all experiments with a 0.3 mm Pt wire as the counter electrode, Ag/3 M AgCl as the reference electrode, and a 1 mm diameter glassy carbon electrode. Cyclic voltammograms were recorded using a microautolab type 2/PGSTAT12 potentiostat using NOVA 1.5.

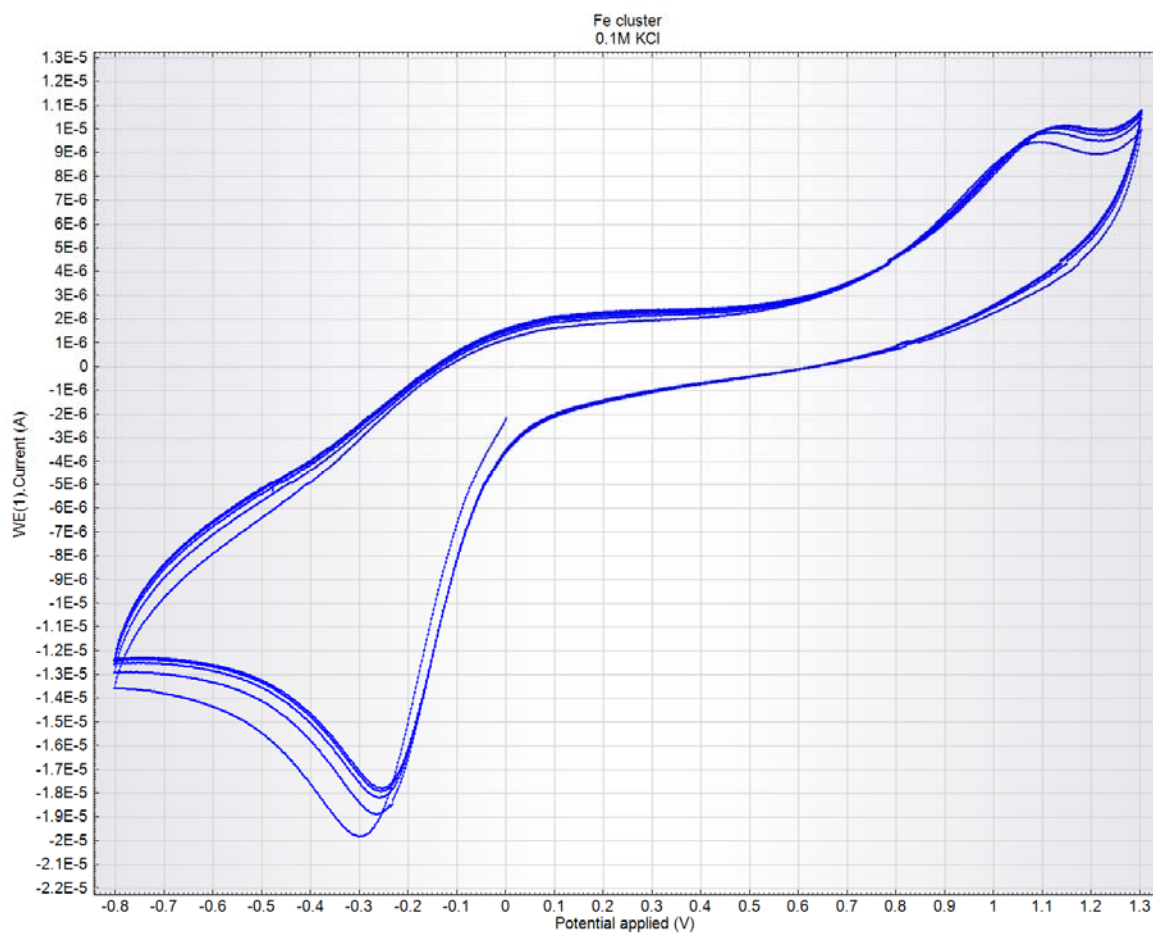

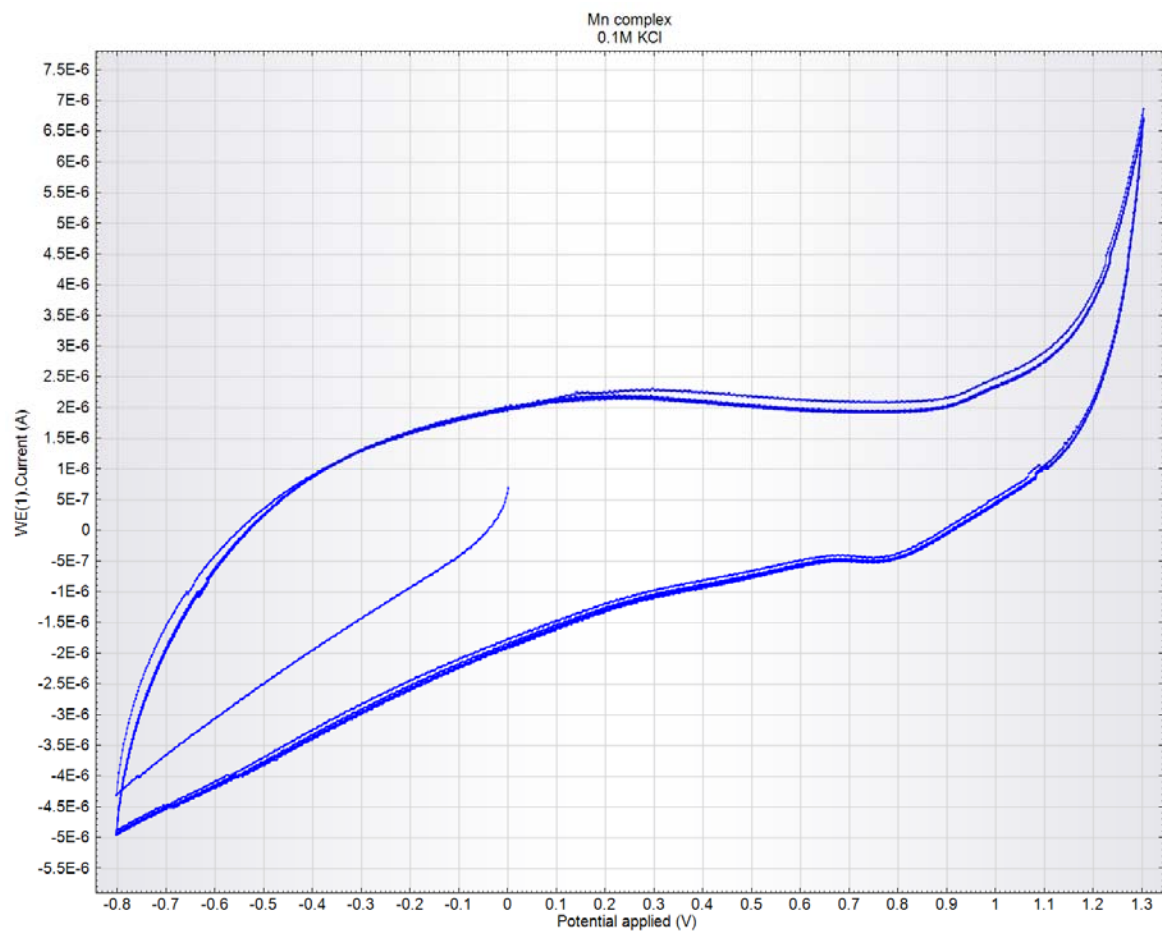

## XPS Data

C:\data\LTU\Richards\A\20101124\20101124.vms  
Date printed: 11/30/10 12:25:40

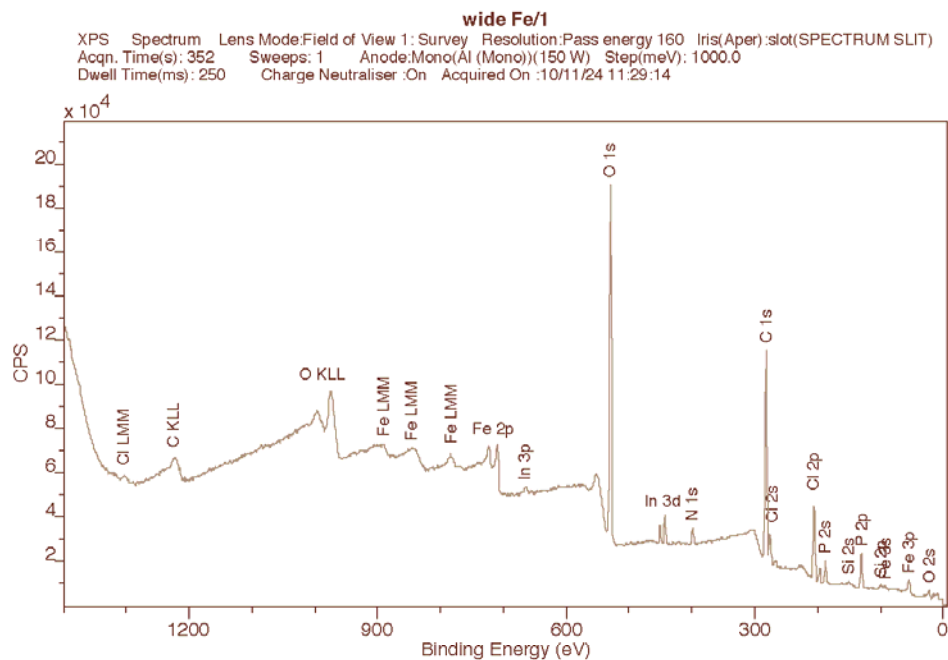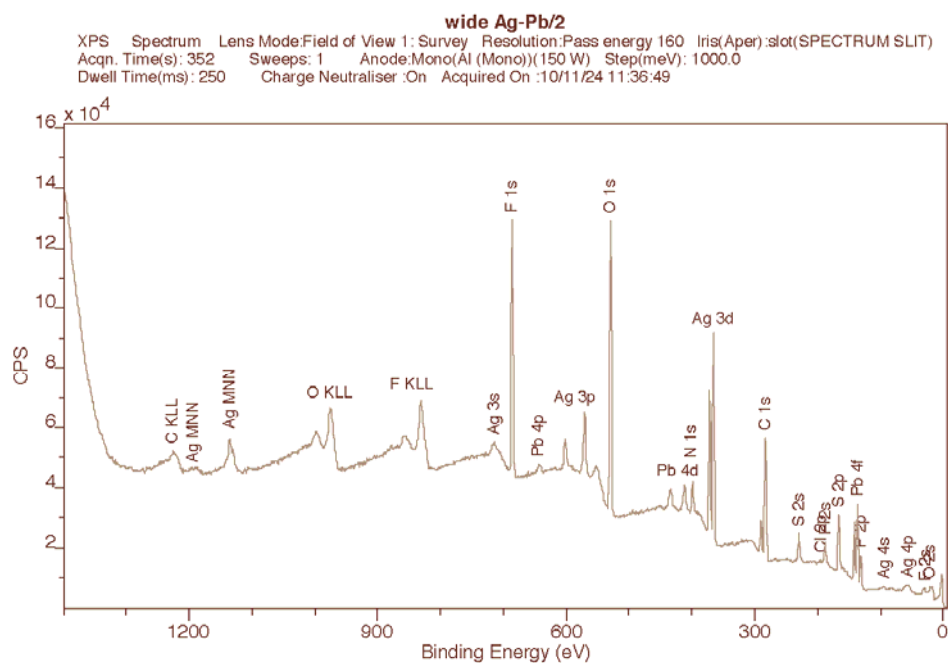

Centre for Materials and Surface Science, Department of Physics, La Trobe University

## Emission Spectrum for 8.

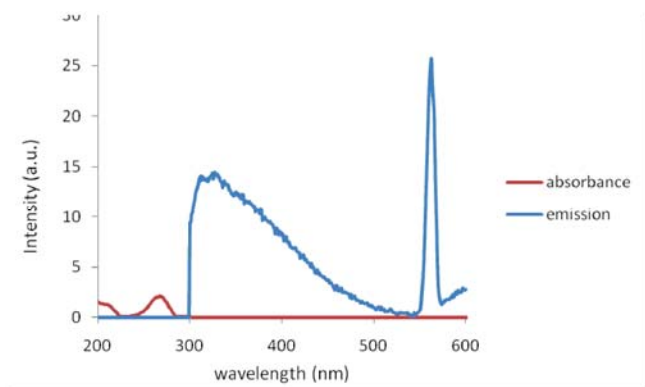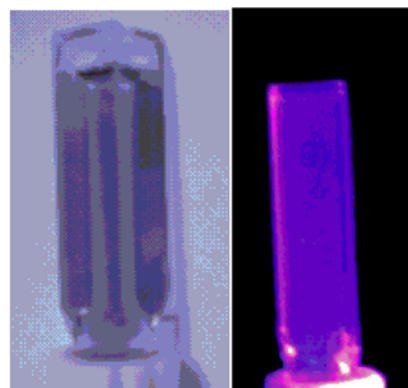

Emission spectrum of 8 (left hand side) and on the right hand side the material under natural light (on the left) and under UV light 365 nm
